# Supplementary material for: Insulin Access and Affordability Working Group: Conclusions and Recommendations
Source: Oxford University Press journal article supplement (doi:10.2337/dci18-0019), 2018-05-08
Supplement: dci180019supplementarydata.pdf [file dci180019supplementarydata.pdf]

SUPPLEMENTARY DATA

**Supplementary Table 1. Insulin Access and Affordability Working Group Members**

| <b>Chair: William T. Cefalu, MD, Chief Scientific, Medical and Mission Officer</b> |                                                                                           |                                                                                                                                                                                                                                                          |                     |
|------------------------------------------------------------------------------------|-------------------------------------------------------------------------------------------|----------------------------------------------------------------------------------------------------------------------------------------------------------------------------------------------------------------------------------------------------------|---------------------|
| <b>Board Members</b>                                                               |                                                                                           |                                                                                                                                                                                                                                                          |                     |
| <u>Name</u>                                                                        | Title                                                                                     | Affiliation                                                                                                                                                                                                                                              | Location            |
| Alvin C. Powers, MD                                                                | ADA President, Medicine & Science, 2017                                                   | Joe C. Davis Chair in Biomedical Science; Professor of Medicine in Molecular Physiology and Biophysics; Director of the Vanderbilt Diabetes Center; and Director of the Division of Diabetes and Endocrinology, Vanderbilt University School of Medicine | Nashville, TN       |
| Alan L. Yatvin, JD                                                                 | Member, ADA Board of Directors, 2015 - 2017                                               | Popper & Yatvin                                                                                                                                                                                                                                          | Philadelphia, PA    |
| <b>Expert Members</b>                                                              |                                                                                           |                                                                                                                                                                                                                                                          |                     |
| Daniel E. Dawes, JD                                                                | Associate Professor                                                                       | H. Wayne Huizenga College of Business and Entrepreneurship, Nova Southeastern University                                                                                                                                                                 | Fort Lauderdale, FL |
| Gina Gavlak, RN, BSN                                                               | President & CEO                                                                           | North Coast Health                                                                                                                                                                                                                                       | Lakewood, OH        |
| Dana P. Goldman, PhD                                                               | Leonard D. Schaeffer Chair and Director                                                   | USC Schaeffer Center for Health Policy & Economics                                                                                                                                                                                                       | Los Angeles, CA     |
| William H. Herman, MD, MPH                                                         | Professor of Internal Medicine and Epidemiology                                           | University of Michigan                                                                                                                                                                                                                                   | Ann Arbor, MI       |
| Simeon I. Taylor, MD, PhD                                                          | Professor of Medicine, and Director of the Mid-Atlantic Nutrition Obesity Research Center | University of Maryland School of Medicine                                                                                                                                                                                                                | Baltimore, MD       |
| Karen Van Nuys, PhD                                                                | Executive Director, Value in Life Sciences Innovation Project                             | USC Schaeffer Center for Health Policy & Economics                                                                                                                                                                                                       | Los Angeles, CA     |
| <b>ADA Staff</b>                                                                   |                                                                                           |                                                                                                                                                                                                                                                          |                     |
| Michelle Kirkwood                                                                  | Vice President, Strategic Communications & Public Relations                               | ADA                                                                                                                                                                                                                                                      | Arlington, VA       |
| Krista Maier, JD                                                                   | Vice President, Public Policy & Strategic Alliances                                       | ADA                                                                                                                                                                                                                                                      | Arlington, VA       |
| LaShawn McIver, MD, MPH                                                            | Senior Vice President, Government Affairs &                                               | ADA                                                                                                                                                                                                                                                      | Arlington, VA       |

## SUPPLEMENTARY DATA

|              |                                                     |     |               |
|--------------|-----------------------------------------------------|-----|---------------|
|              | Advocacy                                            |     |               |
| Mary Merkin  | Senior Manager,<br>Scientific, Medical &<br>Mission | ADA | Arlington, VA |
| Meghan Riley | Vice President, Federal<br>Government Affairs       | ADA | Arlington, VA |

SUPPLEMENTARY DATA

**Supplementary Table 2. Category and number of Stakeholders that interacted with Working Group**

|                                                                 |
|-----------------------------------------------------------------|
| <b>Pharmaceutical Companies:</b> N = 6                          |
| <b>Pharmacy Benefit Managers:</b> N = 2                         |
| <b>Pharmacies or their representatives:</b> N = 5               |
| <b>Health Plans/Systems:</b> N = 5                              |
| <b>Distributors:</b> N = 1                                      |
| <b>Other:</b> ACCIS Study Investigators; health service startup |
| <b>Patient Group:</b> Convened individuals with diabetes        |

**Supplementary Table 3. Sample Questions addressed to Stakeholders**

|                                                                                                                                                                                                                              |
|------------------------------------------------------------------------------------------------------------------------------------------------------------------------------------------------------------------------------|
| What are the main issues and concerns you have with the current drug pricing system throughout the supply chain? What is the biggest challenge your company or organization faces in the insulin supply chain?               |
| What are the most important factors driving price increases and growing costs for insulin?                                                                                                                                   |
| What proposed changes to the system would mitigate your company or organization's concerns and help lower the cost of insulin for patients?                                                                                  |
| How can stakeholders work together to find a long-term, sustainable solution to make insulin affordable for individuals with diabetes?                                                                                       |
| How can the ADA help find a long-term solution to make insulin affordable for individuals with diabetes?                                                                                                                     |
| <b>Manufacturers:</b> Can you provide information on how pricing for your new and existing insulins is established? What criteria are used to arrive at a suggested list price?                                              |
| <b>PBMs:</b> What factors influence placement for the new and existing insulins on a particular formulary?                                                                                                                   |
| <b>PBMs:</b> Can you comment on factors that affect the list price from the manufacturers? What factors are involved in establishing, suggesting, or negotiating a rebate? What factors determine other administrative fees? |
| <b>PBMs:</b> How are rebates passed on to consumers either directly or indirectly through insurers/employers?                                                                                                                |
| <b>PBMs:</b> What is your role in keeping down prices for uninsured/underinsured/high deductible/donut hole consumers?                                                                                                       |
| <b>Health Plans:</b> How does your company determine the formulary, tiering, and cost-sharing for insulins?                                                                                                                  |
| <b>Pharmacists:</b> How do pharmacists interact with manufacturers, PBMs, and pharmacies?                                                                                                                                    |
| <b>Individuals with Diabetes:</b> What type of health coverage do you have?                                                                                                                                                  |
| <b>Individuals with Diabetes:</b> What are your out-of-pocket costs for insulin? What impact has this had on you? For example, have you cut back on other expenses? Has it impacted your insulin dosing?                     |
| <b>Individuals with Diabetes:</b> Are you using any services to help mitigate the cost of insulin?                                                                                                                           |
